# Supplementary material for: Fusarium Species Associated with Maize Leaf Blight in Heilongjiang Province, China
Source: MDPI journal article supplement (doi:10.3390/jof8111170), 2022-11-06
Supplement: s1 [file s1]

# ***Fusarium* species associated with maize leaf blight in Heilongjiang province, China**

**Xi Xu<sup>1</sup>, Li Zhang<sup>1</sup>, Xilang Yang<sup>1</sup>, Guijin Shen<sup>1</sup>, Shuo Wang<sup>1</sup>, Haolin Teng<sup>1</sup>, Chunbo Yang<sup>1</sup>, Xueyan Liu<sup>1</sup>, Xiangjing Wang<sup>1,2</sup>, Junwei Zhao<sup>\*</sup>, Wensheng Xiang<sup>1,2\*</sup>**

<sup>1</sup> Key Laboratory of Agricultural Microbiology of Heilongjiang Province, Northeast Agricultural University, No. 600 Changjiang Road, Xiangfang District, Harbin 150030, P.R. China

<sup>2</sup> State Key Laboratory for Biology of Plant Diseases and Insect Pests, Institute of Plant Protection, Chinese Academy of Agricultural Sciences, Beijing 100097, P.R. China

<sup>\*</sup> Email: xiangwensheng@neau.edu.cn; zhaojunwei@neau.edu.cn

## **Content:**

**Supplementary Table S1**

**Supplementary Table S2**

**Supplementary Table S3**

**Table S1.** *Tef1* gene sequences similarity to reference strain.

| Species                    | <i>tef1</i> |
|----------------------------|-------------|
| <i>F. ipomoeae</i>         | 98.83-100   |
| <i>F. compactum</i>        | 99.22-100   |
| <i>F. flagelliforme</i>    | 96.09       |
| <i>F. citri</i>            | 99.61       |
| <i>Fusarium</i> sp.        | 100         |
| <i>F. armeniacum</i>       | 100         |
| <i>F. sporotrichioides</i> | 98.56       |
| <i>F. asiaticum</i>        | 100         |
| <i>F. graminearum</i>      | 100         |
| <i>F. acuminatum</i>       | 100         |
| <i>F. verticillioides</i>  | 99.60       |
| <i>F. temperatum</i>       | 100         |
| <i>F. glycines</i>         | 99.61       |
| <i>F. annulatum</i>        | 100         |

**Table S2.** Disease index and disease incidence on maize leaves inoculated with different *Fusarium* isolates.

| Isolates | Species             | Disease index | Disease incidence |
|----------|---------------------|---------------|-------------------|
| HA-z142  | <i>F. ipomoeae</i>  | 61.67         | 37.06             |
| HA-z11   | <i>F. ipomoeae</i>  | 52.78         | 24.00             |
| HA-z12   | <i>F. ipomoeae</i>  | 58.78         | 34.17             |
| HA-z13   | <i>F. ipomoeae</i>  | 73.78         | 49.17             |
| HA-z14   | <i>F. ipomoeae</i>  | 61.67         | 37.06             |
| HA-z15   | <i>F. ipomoeae</i>  | 62.78         | 38.17             |
| HA-z16   | <i>F. ipomoeae</i>  | 75.28         | 50.67             |
| HA-z17   | <i>F. ipomoeae</i>  | 72.88         | 48.27             |
| HA-z18   | <i>F. ipomoeae</i>  | 64.67         | 41.06             |
| HA-z19   | <i>F. ipomoeae</i>  | 59.78         | 38.17             |
| HA-z20   | <i>F. ipomoeae</i>  | 58.78         | 36.17             |
| HA-z21   | <i>F. ipomoeae</i>  | 75.88         | 56.10             |
| HA-z22   | <i>F. ipomoeae</i>  | 62.07         | 43.26             |
| HA-x22   | <i>F. ipomoeae</i>  | 62.78         | 38.17             |
| HA-xy82  | <i>F. ipomoeae</i>  | 62.88         | 38.27             |
| HA-xy83  | <i>F. ipomoeae</i>  | 74.68         | 52.07             |
| HA-31    | <i>F. ipomoeae</i>  | 63.67         | 39.06             |
| SH-11    | <i>F. ipomoeae</i>  | 58.78         | 34.17             |
| SH-63    | <i>F. ipomoeae</i>  | 60.78         | 37.17             |
| WC-31    | <i>F. ipomoeae</i>  | 77.78         | 62.50             |
| QQ-41    | <i>F. ipomoeae</i>  | 61.67         | 38.06             |
| SH-62    | <i>F. ipomoeae</i>  | 57.68         | 33.07             |
| HA-z201  | <i>F. ipomoeae</i>  | 62.78         | 38.17             |
| HA-21    | <i>F. ipomoeae</i>  | 75.78         | 51.17             |
| HA-22    | <i>F. ipomoeae</i>  | 61.67         | 37.06             |
| HA-x21   | <i>F. ipomoeae</i>  | 59.78         | 35.17             |
| HA-212   | <i>F. ipomoeae</i>  | 52.78         | 28.17             |
| DQ-n22   | <i>F. ipomoeae</i>  | 71.78         | 47.17             |
| JX-21    | <i>F. ipomoeae</i>  | 59.67         | 35.06             |
| DQ-n31   | <i>F. ipomoeae</i>  | 62.78         | 38.17             |
| HA-61    | <i>F. compactum</i> | 75.36         | 31.85             |
| HA-111   | <i>F. compactum</i> | 58.12         | 25.10             |
| JX-y11   | <i>F. compactum</i> | 73.62         | 46.29             |
| HA-621   | <i>F. compactum</i> | 58.81         | 32.95             |
| SYS-31   | <i>F. compactum</i> | 54.12         | 46.26             |
| HA-z152  | <i>F. compactum</i> | 73.25         | 38.40             |
| HA-z31   | <i>F. compactum</i> | 59.91         | 41.05             |
| HA-z32   | <i>F. compactum</i> | 73.22         | 47.16             |
| HA-z33   | <i>F. compactum</i> | 65.36         | 46.40             |
| HA-z34   | <i>F. compactum</i> | 68.01         | 38.05             |
| HA-z35   | <i>F. compactum</i> | 74.12         | 47.16             |
| HA-z36   | <i>F. compactum</i> | 73.36         | 38.34             |
| HA-z37   | <i>F. compactum</i> | 65.01         | 36.05             |
| HA-z38   | <i>F. compactum</i> | 74.12         | 41.16             |
| HA-z39   | <i>F. compactum</i> | 65.30         | 48.40             |
| HA-z310  | <i>F. compactum</i> | 63.01         | 34.05             |
| HA-z311  | <i>F. compactum</i> | 68.12         | 47.16             |
| HA-z312  | <i>F. compactum</i> | 75.36         | 46.40             |
| HA-xy151 | <i>F. compactum</i> | 61.01         | 42.95             |
| HA-xy31  | <i>F. compactum</i> | 74.12         | 47.16             |
| HA-a11   | <i>F. compactum</i> | 73.36         | 46.40             |
| HA-42    | <i>F. compactum</i> | 69.91         | 36.05             |
| JX-52    | <i>F. compactum</i> | 74.12         | 31.16             |
| JX-121   | <i>F. compactum</i> | 73.36         | 63.50             |
| JX-31    | <i>F. compactum</i> | 63.01         | 46.66             |
| HA-x12   | <i>F. citri</i>     | 55.63         | 24.00             |
| QTH-21   | <i>F. citri</i>     | 77.78         | 65.20             |
| HA-z1125 | <i>F. citri</i>     | 59.75         | 36.43             |
| HA-z171  | <i>F. citri</i>     | 73.95         | 50.63             |
| HA-z172  | <i>F. citri</i>     | 65.63         | 41.31             |
| HA-z173  | <i>F. citri</i>     | 71.50         | 48.18             |

| Isolates  | Species                    | Disease index | Disease incidence |
|-----------|----------------------------|---------------|-------------------|
| HA-z174   | <i>F. citri</i>            | 62.89         | 39.57             |
| HA-z175   | <i>F. citri</i>            | 67.78         | 44.46             |
| HA-z176   | <i>F. citri</i>            | 57.45         | 34.03             |
| HA-z177   | <i>F. citri</i>            | 67.78         | 44.46             |
| HA-z1126  | <i>F. citri</i>            | 72.98         | 48.36             |
| HA-xy141  | <i>F. citri</i>            | 66.74         | 43.42             |
| HA-z203   | <i>F. citri</i>            | 56.14         | 32.82             |
| HA-x11    | <i>F. flagelliforme</i>    | 51.85         | 23.03             |
| HA-x51    | <i>F. flagelliforme</i>    | 74.78         | 59.50             |
| HA-a31    | <i>F. graminearum</i>      | 75.35         | 60.23             |
| HG-11     | <i>F. graminearum</i>      | 85.12         | 75.30             |
| QTH-23    | <i>F. graminearum</i>      | 76.21         | 57.82             |
| SH-x72    | <i>F. graminearum</i>      | 84.67         | 66.28             |
| SYS-y21   | <i>F. graminearum</i>      | 75.72         | 57.33             |
| SYS-21    | <i>F. graminearum</i>      | 83.63         | 65.24             |
| SYS-141   | <i>F. graminearum</i>      | 77.11         | 58.72             |
| SYS-142   | <i>F. graminearum</i>      | 82.23         | 63.84             |
| SYS-143   | <i>F. graminearum</i>      | 78.314        | 59.92             |
| SYS-144   | <i>F. graminearum</i>      | 81.03         | 62.64             |
| SYS-145   | <i>F. graminearum</i>      | 79.12         | 60.73             |
| SYS-146   | <i>F. graminearum</i>      | 88.04         | 69.65             |
| SYS-147   | <i>F. graminearum</i>      | 76.44         | 58.05             |
| HA-a142   | <i>F. graminearum</i>      | 80.30         | 61.91             |
| SYS-x71   | <i>F. asiaticum</i>        | 60.42         | 42.67             |
| SYS-x91   | <i>F. asiaticum</i>        | 74.75         | 57.02             |
| HA-x72    | <i>F. asiaticum</i>        | 61.22         | 43.98             |
| HG-x62    | <i>F. asiaticum</i>        | 73.95         | 57.71             |
| SYS-x62   | <i>F. asiaticum</i>        | 62.72         | 45.48             |
| SYS-x131  | <i>F. asiaticum</i>        | 72.45         | 55.21             |
| SYS-x132  | <i>F. asiaticum</i>        | 63.82         | 46.58             |
| SYS-x133  | <i>F. asiaticum</i>        | 71.25         | 54.01             |
| SYS-x134  | <i>F. asiaticum</i>        | 64.62         | 47.38             |
| SYS-x135  | <i>F. asiaticum</i>        | 70.65         | 53.41             |
| HA-zh142  | <i>F. temperatum</i>       | 60.42         | 52.47             |
| QTH-X332  | <i>F. temperatum</i>       | 74.75         | 63.48             |
| QTH-X331  | <i>F. temperatum</i>       | 61.22         | 53.19             |
| QTH-X33   | <i>F. temperatum</i>       | 73.95         | 62.73             |
| HA-z113   | <i>Fusarium</i> sp.        | 70.54         | 63.77             |
| HA-b113   | <i>Fusarium</i> sp.        | 77.22         | 74.35             |
| HA-Z1131  | <i>Fusarium</i> sp.        | 83.9          | 69.05             |
| SYS-x11   | <i>F. sporotrichioides</i> | 61.11         | 31.25             |
| SYS-x61   | <i>F. sporotrichioides</i> | 59.33         | 30.49             |
| SYS-x1    | <i>F. sporotrichioides</i> | 59.11         | 30.29             |
| SYS-x2    | <i>F. sporotrichioides</i> | 60.78         | 30.98             |
| HG-12     | <i>F. sporotrichioides</i> | 59.66         | 30.67             |
| SYS-33    | <i>F. sporotrichioides</i> | 60.11         | 30.87             |
| SYS-101   | <i>F. sporotrichioides</i> | 60.58         | 30.92             |
| SYS-102   | <i>F. sporotrichioides</i> | 59.33         | 30.49             |
| SYS-103   | <i>F. sporotrichioides</i> | 61.00         | 31.02             |
| SYS-104   | <i>F. sporotrichioides</i> | 61.11         | 31.25             |
| SYS-105   | <i>F. sporotrichioides</i> | 58.35         | 30.15             |
| SYS-51    | <i>F. sporotrichioides</i> | 59.00         | 30.25             |
| HG-y102   | <i>F. sporotrichioides</i> | 58.34         | 30.15             |
| HG-DBY101 | <i>F. sporotrichioides</i> | 58.33         | 30                |
| SH-z61    | <i>F. acuminatum</i>       | 62.56         | 44.21             |
| SH-61     | <i>F. acuminatum</i>       | 74.72         | 61.11             |
| SH-41     | <i>F. acuminatum</i>       | 63.74         | 45.36             |
| HA-a72    | <i>F. acuminatum</i>       | 73.54         | 60.56             |
| HA-a161   | <i>F. acuminatum</i>       | 64.87         | 46.83             |
| HA-a162   | <i>F. acuminatum</i>       | 72.41         | 59.87             |
| HA-a163   | <i>F. acuminatum</i>       | 65.93         | 47.32             |
| HA-a164   | <i>F. acuminatum</i>       | 71.35         | 58.67             |
| HA-a1211  | <i>F. armeniacum</i>       | 61.11         | 32.5              |
| HA-13     | <i>F. armeniacum</i>       | 72.22         | 52.5              |

| Isolates | Species                   | Disease index | Disease incidence |
|----------|---------------------------|---------------|-------------------|
| HA-a121  | <i>F. armeniacum</i>      | 61.56         | 32.5              |
| HA-a122  | <i>F. armeniacum</i>      | 64.44         | 48.5              |
| HL-42    | <i>F. verticillioides</i> | 62.22         | 33.42             |
| DQ-n32   | <i>F. verticillioides</i> | 73.16         | 53.2              |
| SH-n12   | <i>F. verticillioides</i> | 62.34         | 33.57             |
| JX-123   | <i>F. verticillioides</i> | 68.34         | 50.16             |
| SH-n11   | <i>F. verticillioides</i> | 63.52         | 36.98             |
| SH-n201  | <i>F. verticillioides</i> | 63.78         | 37.23             |
| SH-n202  | <i>F. verticillioides</i> | 63.87         | 37.32             |
| SH-n203  | <i>F. verticillioides</i> | 70.16         | 48.32             |
| SH-n204  | <i>F. verticillioides</i> | 65.22         | 39.62             |
| SH-n205  | <i>F. verticillioides</i> | 63.16         | 35.87             |
| JX-3352  | <i>F. glycines</i>        | 67.78         | 45.05             |
| JX-335   | <i>F. glycines</i>        | 68.87         | 45.19             |
| HA-171   | <i>F. glycines</i>        | 71.32         | 45.83             |
| HA-172   | <i>F. glycines</i>        | 72.11         | 46                |
| HA-173   | <i>F. glycines</i>        | 61.11         | 44                |
| HA-174   | <i>F. glycines</i>        | 70.35         | 45.62             |
| WC-b53   | <i>F. glycines</i>        | 65.83         | 44.49             |
| HA-z1412 | <i>F. glycines</i>        | 64.90         | 44.22             |
| WC-22    | <i>F. annulatum</i>       | 63.93         | 40.50             |

**Table S3.** DNA polymorphism data for FIESC isolates based on *tef1* gene sequences.

| <b>Polymorphism parameter</b>                      | <b><i>tef1</i></b>     |
|----------------------------------------------------|------------------------|
| Number of isolates                                 | 70                     |
| Analyzed region                                    | 1-263                  |
| Number of haplotypes, H                            | 7                      |
| Number of polymorphic sites, S                     | 28                     |
| Number of mutations, Eta                           | 28                     |
| Singleton variable sites                           | 0                      |
| Haplotype diversity, <i>h</i>                      | 0.759                  |
| Nucleotide diversity, $\pi$                        | 0.02396                |
| Average number of nucleotide differences, <i>k</i> | 5.966                  |
| Tajima's D                                         | 0.08450 ( $p > 0.10$ ) |
| Fu and Li's D                                      | 1.86276 ( $p < 0.02$ ) |
| Fu and Li's F                                      | 1.43557 ( $p > 0.10$ ) |
